# Supplementary material for: Investigation of Photocatalytic PVDF Membranes Containing Inorganic Nanoparticles for Model Dairy Wastewater Treatment
Source: MDPI journal article supplement (doi:10.3390/membranes13070656), 2023-07-10
Supplement: s1 [file s1]

Supplementary material

# Investigation of photocatalytic PVDF membranes containing inorganic nanoparticles for model dairy wastewater treatment

Elias Jigar Sisay<sup>1,2</sup>, Ákos Fazekas<sup>1,2</sup>, Tamás Gyulavári<sup>3</sup>, Judit Kopniczky<sup>4</sup>, Béla Hopp<sup>4</sup>, Gábor Veréb<sup>2</sup> and Zsuzsanna László<sup>2,\*</sup>

Supplementary material

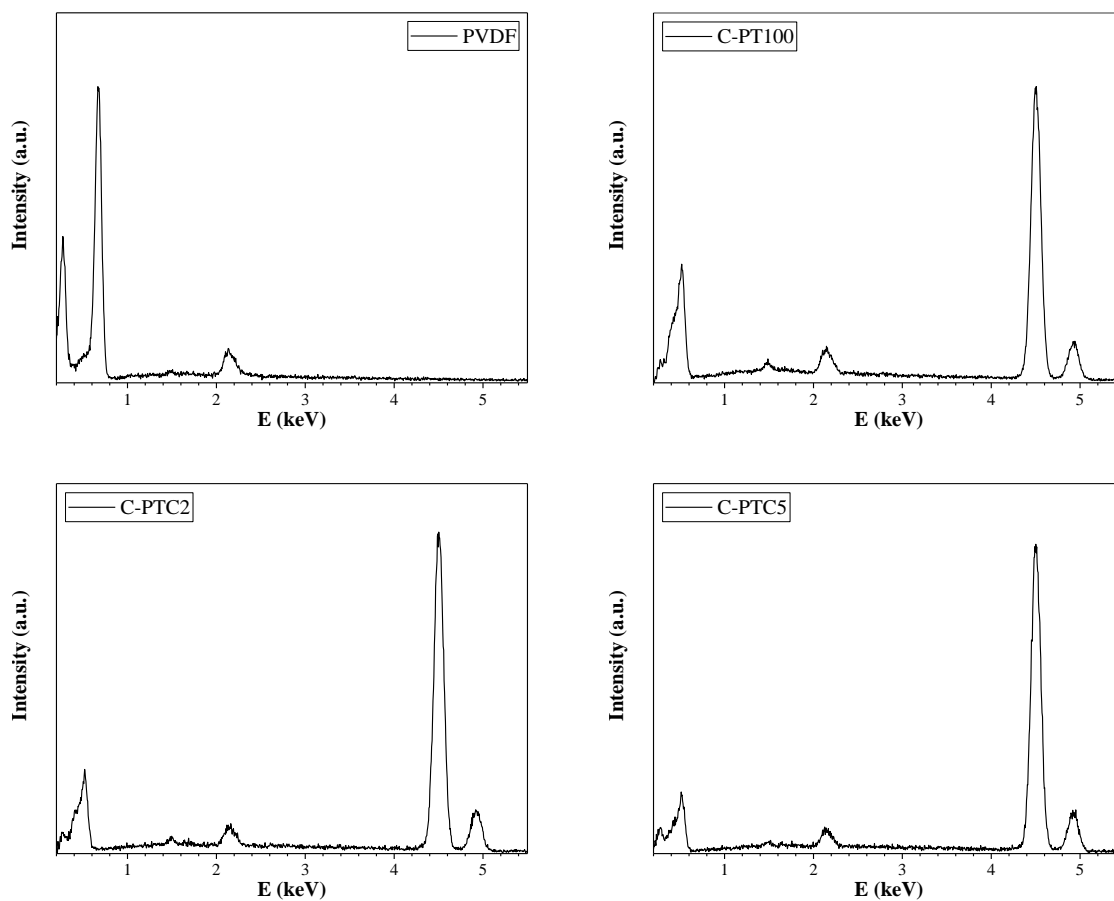

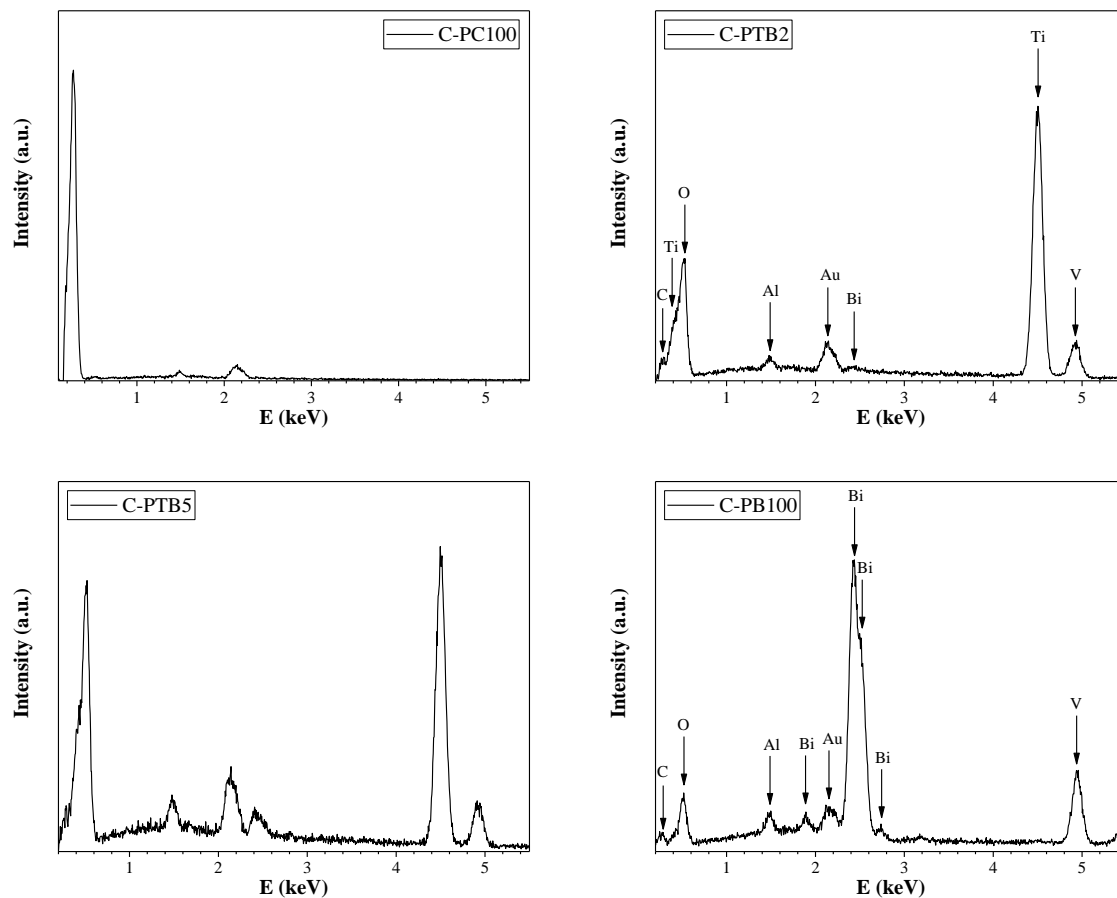

Figure S1. EDX spectra of covered nanocomposite membranes

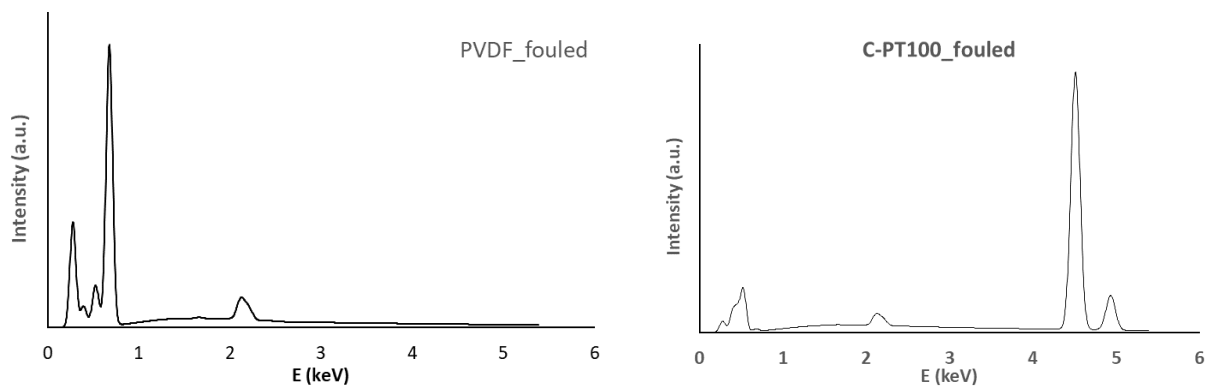

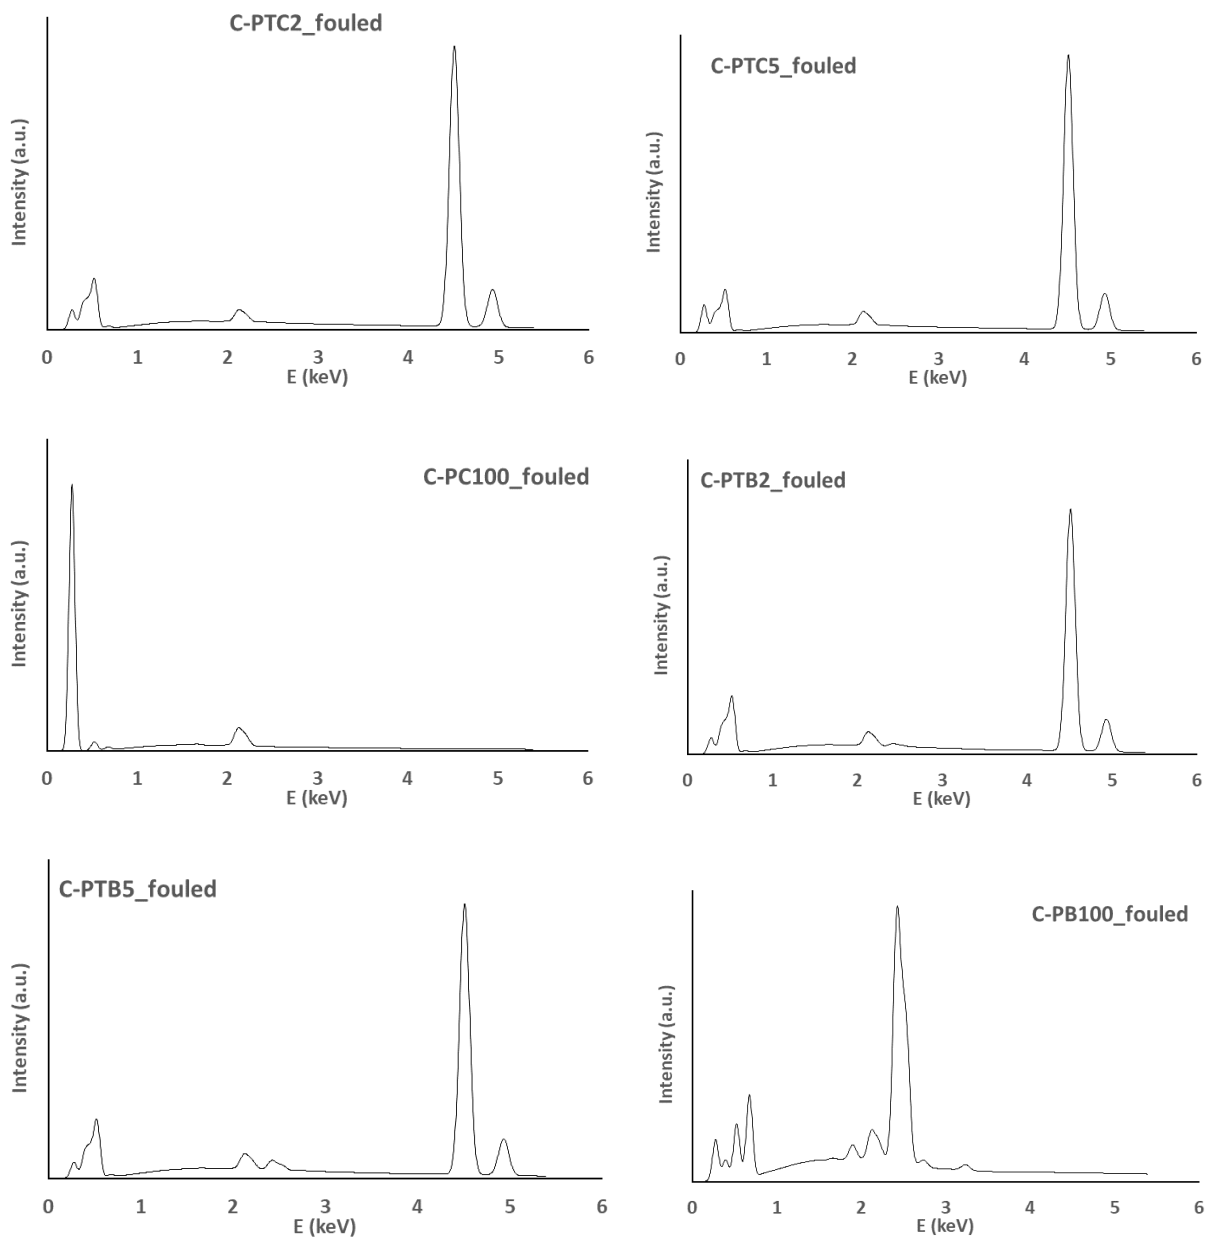

Figure S2. EDX spectra of covered nanocomposite membranes after BSA filtration
